# Supplementary material for: Hollow silver–gold alloy nanoparticles for enhanced photothermal/photodynamic synergetic therapy against bacterial infection and acceleration of wound healing
Source: Royal Society of Chemistry journal article supplement (doi:10.1039/d3bm00567d), 2023-01-01
Supplement: d3bm00567d1.pdf [file d3bm00567d1.pdf]

## Supporting Information

### **Hollow silver-gold alloy nanoparticles for enhanced photothermal/photodynamic synergetic therapy against bacterial infection and acceleration of wound healing**

Shanshan Lin <sup>a, b</sup>, Hui Chen <sup>a, b</sup>, Rui Wang <sup>a, b</sup>, Tongmeng Jiang <sup>a, b</sup>, Rui Wang <sup>a, b, \*</sup>,  
and Fabiao Yu <sup>a, b, \*</sup>

S. Lin, H. Chen, R. Wang, T. Jiang, R. Wang, F. Yu

<sup>a</sup> Key Laboratory of Hainan Trauma and Disaster Rescue, The First Affiliated Hospital of Hainan Medical University, Hainan Medical University, Haikou 571199, China

<sup>b</sup> Engineering Research Center for Hainan Bio-Smart Materials and Bio-Medical Devices, Key Laboratory of Emergency and Trauma, Ministry of Education, Key Laboratory of Hainan Functional Materials and Molecular Imaging, College of Pharmacy, College of Emergency and Trauma, Hainan Medical University, Haikou 571199, China

E-mail: wangrui@hainmc.edu.cn (R. Wang), yufabiao@hainmc.edu.cn (F. Yu).

## 1. Calculation of photothermal conversion efficiency

$$\theta = \frac{T - T_{surr}}{T_{max, NP} - T_{surr}} \#Formula (1)$$

$$t = -\tau_s \ln(\theta) \#Formula (2)$$

$$hs = \frac{m_D c_D}{\tau_s} \#Formula (3)$$

$$\eta = \frac{hs(\Delta T_{NP} - \Delta T_{PBS})}{I(1 - 10^{-A_{808}})} \times 100\% \#Formula (4)$$

Here, the concentration of Ag@Au-Ce6 NPs is 1 nM.  $T_{max, NP}$  is the maximum temperature of Ag@Au-Ce6 NPs after irradiation for 5 min and  $T_{surr}$  is the surrounding environment temperature.  $\tau_s$  is the slope of fitting curve, here the value is 380.31.  $m_D$  and  $c_D$  represent the mass and specific heat capacity of Ag@Au-Ce6 NPs.  $\Delta T_{NP}$  represents the temperature changes of Ag@Au-Ce6 NPs,  $\Delta T_{PBS}$  is the temperature changes of PBS solution, and  $A_{808}$  means the absorbance value. The photothermal conversion efficiency is 33.2% through the calculation.

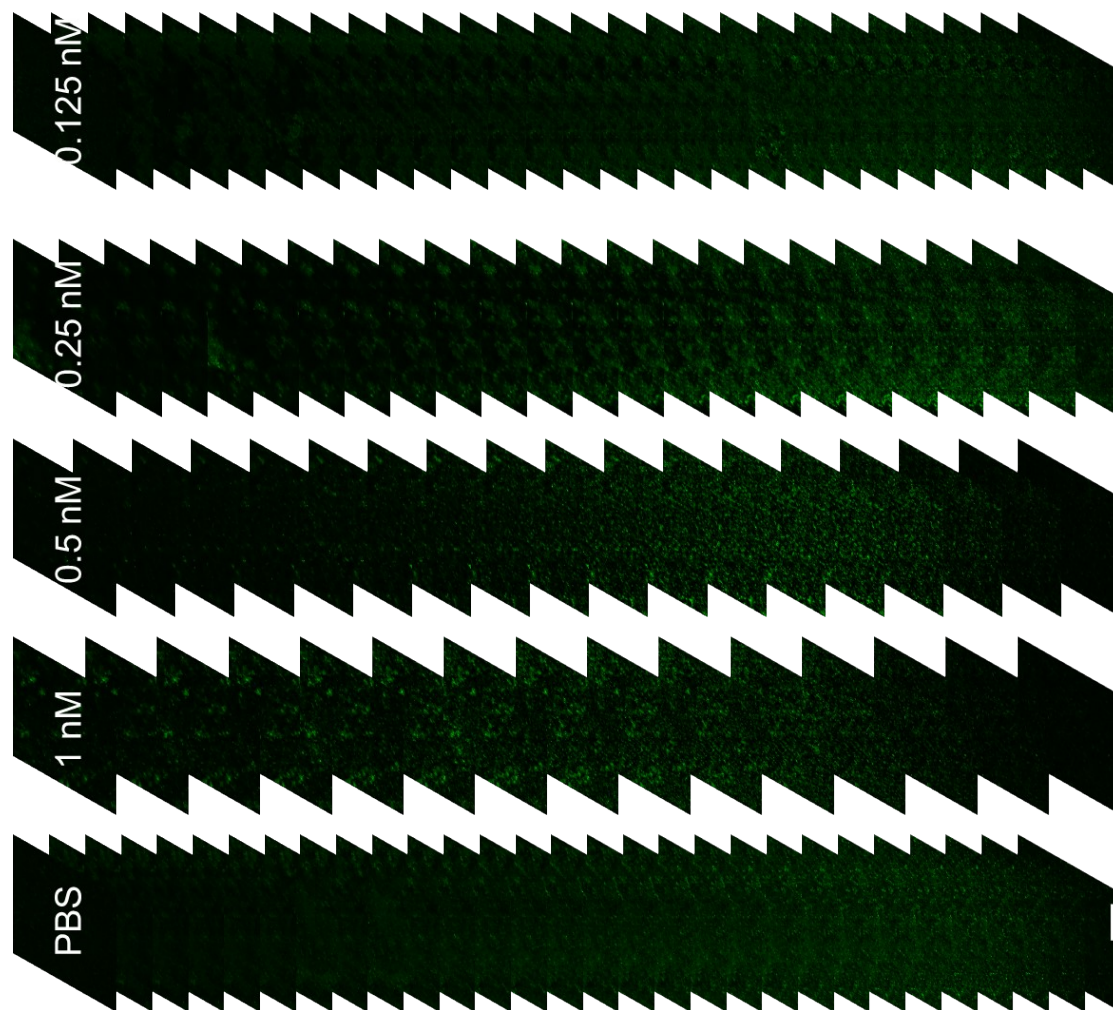

**Fig. S1** Layer-by-layer CLSM images of the final formed *S. aureus* biofilm after the confrontation of Ag@Au-Ce6 NPs with the formed biofilm for different treating time.

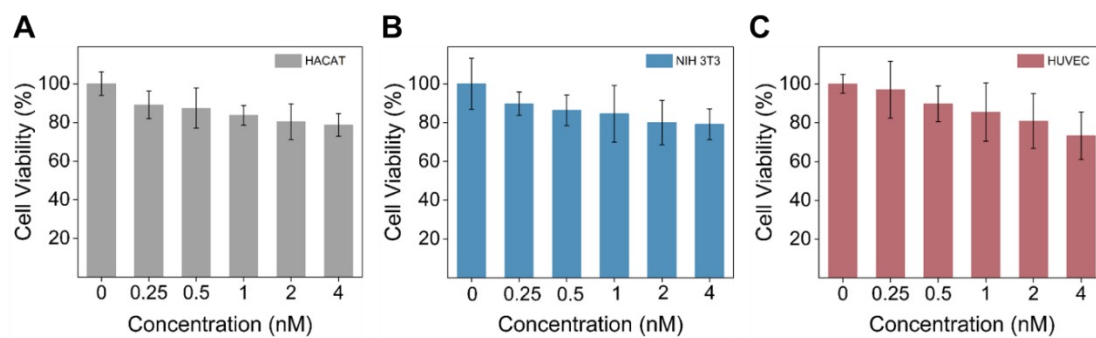

**Fig. S2** CCK8 assay results show cell viability after treatment with various concentrations of Ag@Au-Ce6. A: HACAT (Human dermal keratinocyte) B: NIH 3T3 (mice embryonic fibroblast cells) C: HUVEC (Human umbilical vein endothelial cells)

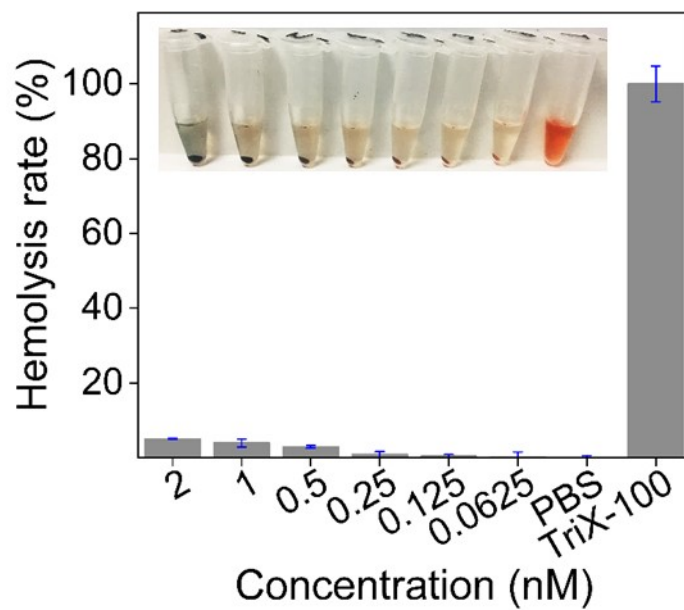

**Fig. S3** Hemolysis rate results of gradient concentration of Ag@Au-Ce6 NPs in mouse blood samples. Inset shows a representative photograph of the results after centrifugation. PBS used as a negative control while triton-x as a positive control.

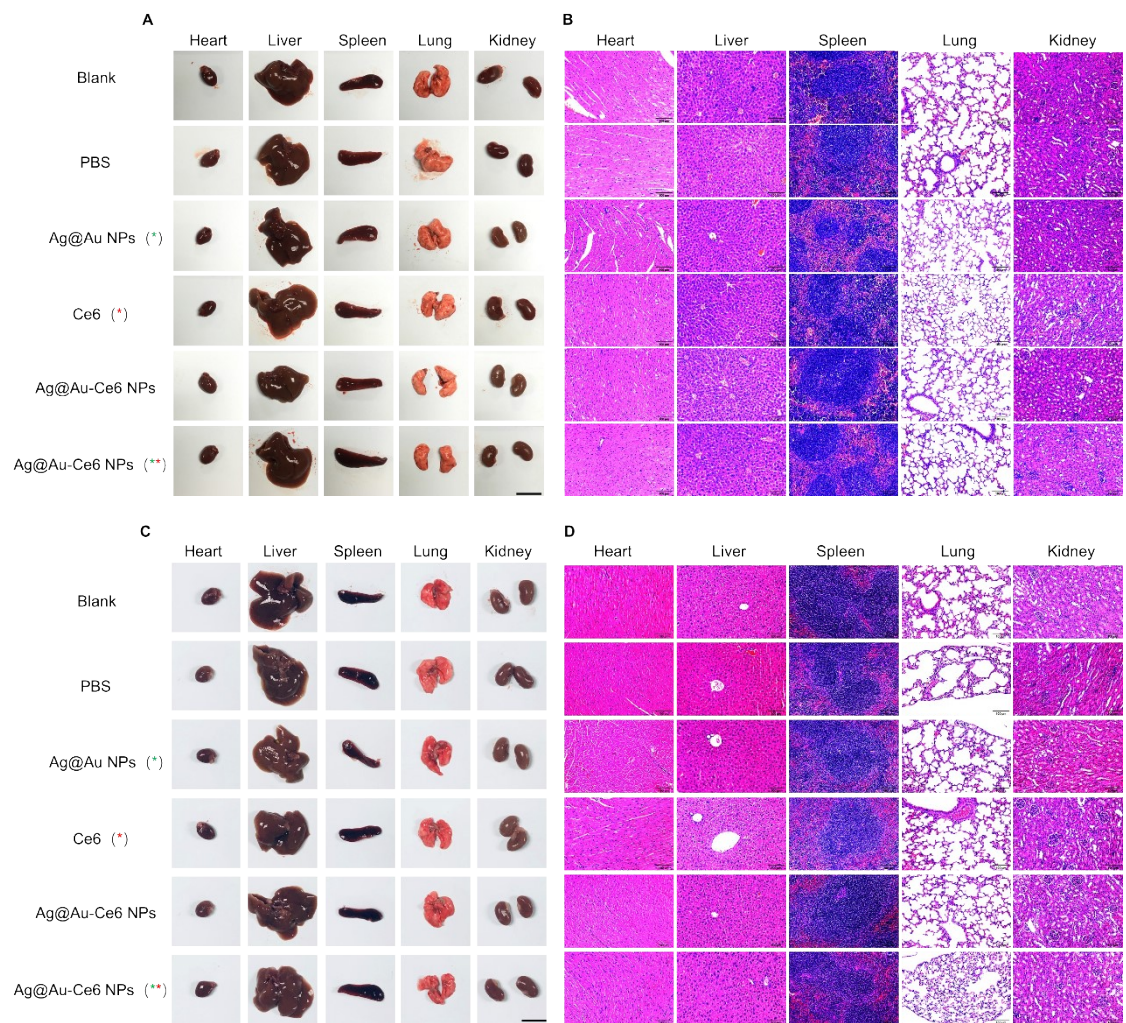

**Fig. S4** Photographs of main organs of mice and corresponding HE staining images.

(A) and (B) are the experimental group of *S. aureus*, and (C) and (D) are the experimental group of *E. coli*. Scale bar of major organs: 1 cm; scale bar of HE staining images: 1  $\mu$ m.
